# Supplementary material for: Suppression of extensive ice formation in hydrogel electrolytes enabling low-temperature aqueous Zn batteries
Source: Royal Society of Chemistry journal article supplement (doi:10.1039/d5ta01314c), 2025-01-01
Supplement: d5ta01314c1.pdf [file d5ta01314c1.pdf]

## Supporting Information

### **Suppression of extensive ice formation in hydrogel electrolytes enabling low-temperature aqueous Zn batteries**

Jialu Bi<sup>a</sup>, Fenglin Zhang<sup>a</sup>, Xuesong Zhao<sup>a</sup>, Ziyang Cai<sup>a</sup>, and Huilin Pan<sup>a\*</sup>

<sup>1</sup>Department of Chemistry, Zhejiang University, Hangzhou 310027, China

\*Corresponding author: Huilin Pan ([panhuilin@zju.edu.cn](mailto:panhuilin@zju.edu.cn))

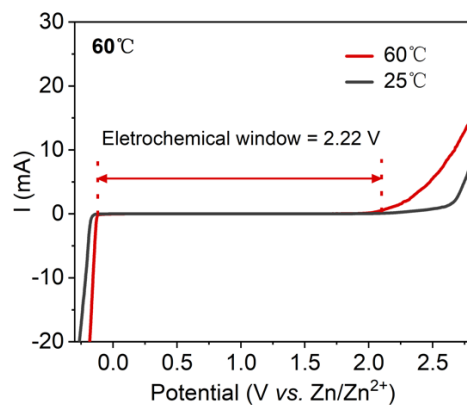

**Fig. S1** The electrochemical voltage windows of PVA-0.5SL at 60°C.

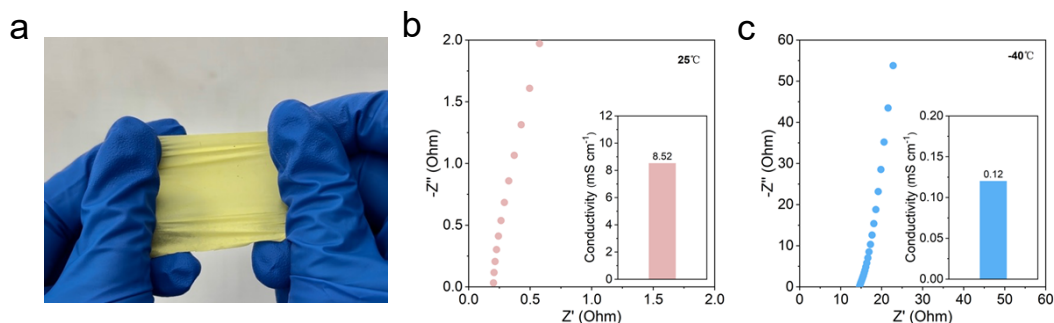

**Fig. S2** (a) Digital photo of PVA-0.5SL embedded in a porous polyimide membrane. Ionic conductivity of PVA-0.5SL embedded in a polyimide membrane at 25°C (b) and -40°C (c).

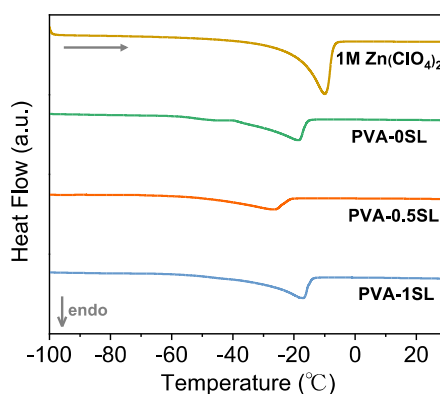

**Fig. S3** DSC curves for 1 M  $\text{Zn}(\text{ClO}_4)_2$  and different PVA-based hydrogel electrolytes during the heating process from -100 to 30°C.

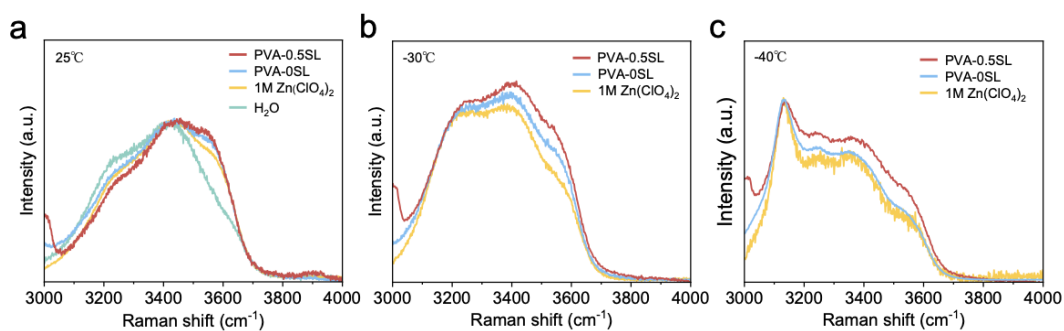

**Fig. S4** Raman spectra of the O-H stretching vibrations for H<sub>2</sub>O molecules in different electrolytes at the temperature of 25°C (a), -30°C (b), and -40°C (c)

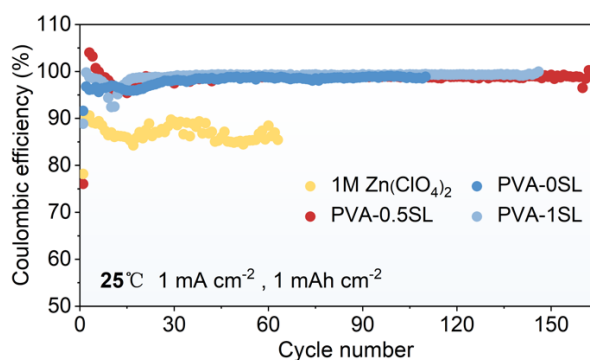

**Fig. S5** Coulombic efficiency for Zn deposition in different electrolyte using Zn||Cu cells under 1 mA cm<sup>-2</sup> and 1 mAh cm<sup>-2</sup>.

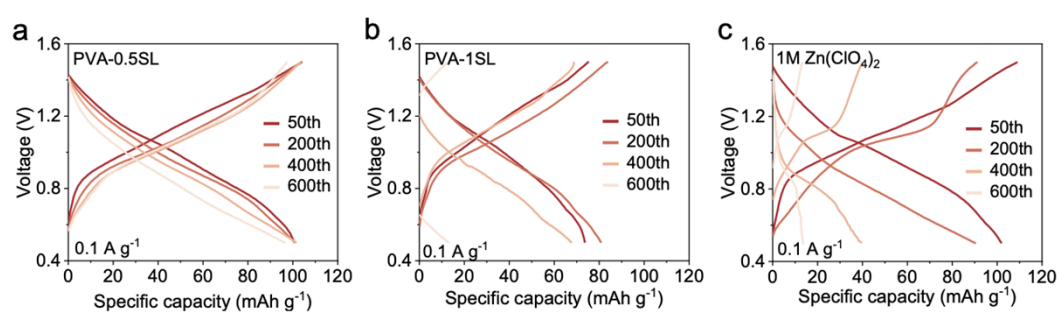

**Fig. S6** Charge-discharge voltage curves of Zn||PANI full cells with different electrolytes at different cycles.

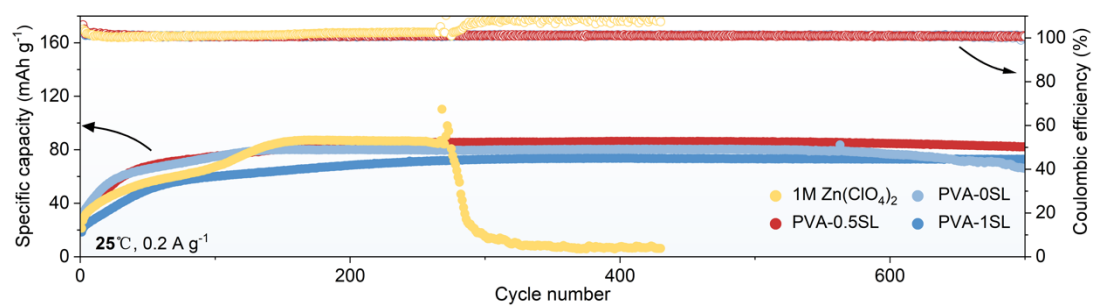

**Fig. S7** Cycling stability of Zn||PANI full cells with different electrolytes at 0.2 A g<sup>-1</sup> and 25°C.
